# Supplementary material
Source: ML conference proceedings conference paper supplement (https://openaccess.thecvf.com/content/CVPR2026/html/Zhao_SAVE_Speech-Aware_Video_CVPR_2026_paper.html)
Supplement: Supplementary file 1 [file Zhao_SAVE_Speech-Aware_Video_CVPR_2026_supplemental.pdf]

# SAVE: Speech-Aware Video Representation Learning for Video-Text Retrieval

## Supplementary Material

In this supplementary material, we provide additional experiments not included in the main paper, including:

- t-SNE visualization of more audio encoders (Sec. S1)
- Using Whisper as the audio encoder (Sec. S2)
- Video-to-Text retrieval results (Sec. S3)
- Using a larger backbone (Sec. S4)
- Qualitative results (Sec. S5)

### S1. Visualization of More Audio Encoders

To verify that the lack of speech semantic understanding observed in AST [9] is a general issue, we extend our analysis to ImageBind [8] and Whisper [36]. Following the same experimental setup as Fig. 1a in the main paper, we visualize the audio embeddings for *sound clips* and *narration clips* across three animal classes using t-SNE. As shown in Fig. S1, while all three models produce distinct clusters for *sound clips*, the embeddings for *narration clips* remain heavily entangled across all encoders. Notably, even Whisper, despite its robust ASR capabilities, fails to disentangle speech semantics in its audio feature space. This confirms that current audio backbones predominantly capture acoustic characteristics rather than high-level speech semantics.

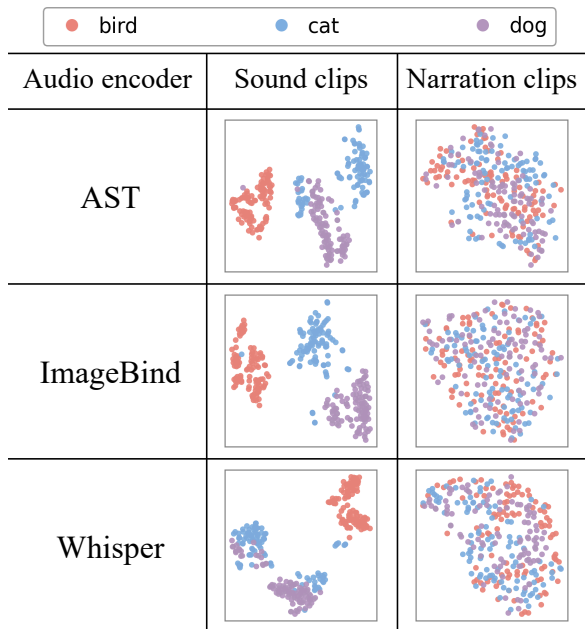

Figure S1. t-SNE visualizations of feature spaces across three audio encoders. All three audio encoders struggle to capture speech semantics.

### S2. Using Whisper as the Audio Encoder

Tab. S1 presents an ablation study examining whether a dedicated speech branch remains necessary when using Whisper, which already possesses ASR capability, as the audio encoder. We introduce SAVE-2, which uses Whisper as the audio encoder, and SAVE-3, which further removes the speech branch. Comparing SAVE-2 and SAVE-3, we observe that removing the speech branch consistently degrades performance on both MSRVTT-9k and MSRVTT-7k, indicating that explicit speech modeling remains beneficial even when the audio encoder itself is ASR-capable.

Table S1. Ablation study of using Whisper as the audio encoder. Backbone: CLIP (ViT-B/32).

| Setup  | Audio   | Speech  | Soft-ALBEF | MSRVTT-9k |       | MSRVTT-7k |       |
|--------|---------|---------|------------|-----------|-------|-----------|-------|
|        |         |         |            | R1        | SumR  | R1        | SumR  |
| SAVE   | AST     | Whisper | ✓          | 51.3      | 216.2 | 33.5      | 165.8 |
| SAVE-2 | Whisper | Whisper | ✓          | 50.9      | 215.8 | 33.8      | 166.8 |
| SAVE-3 | Whisper | ✗       | ✓          | 50.2      | 213.0 | 32.9      | 164.0 |

### S3. Video-to-Text Retrieval Results

For a more comprehensive evaluation, we also report video-to-text retrieval performance on MSRVTT-9k, see Tab. S2. Same as text-to-video retrieval task (Tab. 3), SAVE achieves the highest SumR among all compared methods.

### S4. Using a Larger Backbone

To verify if our method’s superiority holds with a larger backbone, we repeat the main experiments using CLIP (ViT-B/16). As shown in Tab. S3, our SAVE consistently outperforms both vision-only and audiovisual baselines.

### S5. Qualitative Results

To further validate the effectiveness of our speech-aware video representation for text-to-video retrieval, we present qualitative visualizations in Fig. S2. SAVE consistently retrieves the correct video because the dedicated ASR-based speech branch effectively captures speech-related cues that PIG and AVIGATE fail to exploit.

|                                                                                                                                                                                                                                                                                                                                               |        |                                                                                                                                                                                                                                                                                                                                                                             |       |
|-----------------------------------------------------------------------------------------------------------------------------------------------------------------------------------------------------------------------------------------------------------------------------------------------------------------------------------------------|--------|-----------------------------------------------------------------------------------------------------------------------------------------------------------------------------------------------------------------------------------------------------------------------------------------------------------------------------------------------------------------------------|-------|
| <p>Query: a woman talks about a <b>skin care treatment she takes with her everywhere</b></p>  <p>On to jars. These I use for creamier products, things like face cream, eye cream, even toothpaste.</p>                                                      | Rank   | <p>Query: a man in black suit is talking about <b>deforestation and about climate change</b></p>  <p>Samokov is the closest city from Borovets at just 10km. So we stopped there to buy some stuff.</p>                                                                                   | Rank  |
|  <p>Outfit one, basically we're going to the venue from one to 1.30 to interview the models, get some footage backstage, and then that's what this look is for, and my outfit one, and then outfit two...</p>                                                | 1 5 4  |  <p>People are worried about trade-offs, negotiations behind closed doors, etc. You okay with our demonstrations behind you?</p>                                                                                                                                                          | 1 7 6 |
|  <p>Now for my <b>skin savers</b>. I really love a multitasking serum when I travel. So I have been carrying the Sunday Riley Good Dreams <b>treatment with me wherever I go...</b></p>                                                                      | 6 1 2  |  <p><b>deforest the great rain forests</b>, we're going to lose immeasurably. If we continue on a path that fundamentally <b>changes the Earth's climate</b> in a way that's unrecognizable for us in the way...</p>                                                                      | 7 1 2 |
|                                                                                                                                                                                                                                                                                                                                               | 4 2 1  |                                                                                                                                                                                                                                                                                                                                                                             | 4 3 1 |
| <p>Query: people talking about <b>their trip and how they are taken care of</b></p>  <p>that sailed from one island to another together, the copra. People are leaving the motors. They're staying in the village and no longer come to work, the copra.</p> | Rank   | <p>Query: basketball players making a shot in the last <b>seven seconds</b></p>  <p>So Lin with his first assist. He perseveres that time, being hounded by a Rubio. Lin around the street by Jeffries, now pulls up for the jump shot. Got it off the glass!</p>                         | Rank  |
|  <p>Welcome to South Africa, the most powerful economy in Africa. My name is Nomsama Sergio. I'm a BBC reporter based in Johannesburg. I was born and bred here. I look forward...</p>                                                                       | 1 9 22 |  <p>Run in, sending, four nearly took it away. Three, hammered it down over Big Al. An oh my moment!</p>                                                                                                                                                                                  | 1 4 2 |
|  <p>Always remember. It's our first <b>trip</b> together. Our first <b>trip</b> together. It's our seventh <b>trip</b>. We've been very pleased with Grand Circle. <b>They take good care of you</b>. You get to see different things...</p>               | 4 1 2  |  <p>Big time play. <b>Seven seconds</b> left. And Derek knocked that jump. Wool I tell you, they isolated the floor that time. I was wondering who Steph Curry was going to do.</p>                                                                                                     | 2 1 3 |
|                                                                                                                                                                                                                                                                                                                                               | 37 5 1 |                                                                                                                                                                                                                                                                                                                                                                             | 3 2 1 |
| <p>Query: a girl explains about <b>some studies</b> showing some hands</p>  <p>And... Mm, dark circles a little bit Yeah, yeah, yeah Yeah, honey</p>                                                                                                       | Rank   | <p>Query: guy explaining what <b>stiff person syndrome</b> is</p>  <p>Number two is Kuru Disease. Kuru is an incurable disease that has effects similar to that of Mad Cow. The disease has two notable effects. The first is that it makes millions of tiny holes in your brain...</p> | Rank  |
|  <p>When the spiral created by the eccentricity of the planet intersects with that vertical wave from the inclination of the planet, the collisions are enhanced in some places and damped out in others...</p>                                            | 1 1 4  |  <p>SPS, or <b>Stiff Person Syndrome</b>, is a rare neurologic disease that causes the body of a person affected to become progressively rigid as time goes on...</p>                                                                                                                   | 1 1 2 |
|                                                                                                                                                                                                                                                                                                                                               | 14 6 1 |                                                                                                                                                                                                                                                                                                                                                                             | 2 2 1 |
| <p>Query: a guy <b>barbequeing potatoes</b></p>  <p>And again through the miracle of time, these cheese bacon burgers are done. Oh yeah, take a look at that.</p>                                                                                          | Rank   | <p>Query: a man cooks <b>burgers and bacon</b> on a grill</p>  <p>And again through the miracle of time, these cheese bacon burgers are done. Oh yeah, take a look at that.</p>                                                                                                         | Rank  |
|  <p>Now, these burgers are just about done, but we're gonna add some bacon. Oh yeah.</p>                                                                                                                                                                   | 1 3 2  |  <p>All right, put the cover on, and we're baking potatoes.</p>                                                                                                                                                                                                                         | 1 3 2 |
|  <p>All right, put the cover on, and we're <b>baking potatoes</b>.</p>                                                                                                                                                                                     | 2 1 3  |  <p>Now, these <b>burgers</b> are just about done, but we're gonna add some <b>bacon</b>. Oh yeah.</p>                                                                                                                                                                                  | 3 1 3 |
|                                                                                                                                                                                                                                                                                                                                               | 3 2 1  |                                                                                                                                                                                                                                                                                                                                                                             | 2 2 1 |

Figure S2. **Qualitative comparison** of the Top-1 retrieved videos from **PIG**, **AVIGATE**, and **SAVE**, with the same color-coded blocks indicating how each model ranks these candidate videos. Benefiting from the speech branch, **SAVE** consistently assigns the ground-truth video (with green box) the best rank, showing clear advantages on speech-related queries. Best viewed on screen.

Table S2. The video-to-text retrieval performance of different methods. Dataset: MSRVT-9k. Backbone: ViT-B/32.

| Model                    | R1          | R5          | R10         | SumR         |
|--------------------------|-------------|-------------|-------------|--------------|
| <b>Vision-only:</b>      |             |             |             |              |
| CLIP4Clip, Neucom22 [32] | 43.1        | 70.5        | 81.2        | 194.8        |
| X-Pool, CVPR22 [10]      | 44.4        | 73.3        | 84.0        | 201.7        |
| TS2-Net, ECCV22 [30]     | 45.3        | 74.1        | 83.7        | 203.1        |
| X-CLIP, MM22 [33]        | 46.8        | 73.3        | 84.0        | 204.1        |
| DiCoSA, IJCAI23 [20]     | 46.7        | 75.2        | 84.3        | 206.2        |
| PromptSwitch, ICCV23 [3] | 46.0        | 74.3        | 84.8        | 205.1        |
| UATVR, ICCV23 [4]        | 46.9        | 73.8        | 83.8        | 204.5        |
| UCoFiA, ICCV23 [48]      | 47.1        | 74.3        | 83.0        | 204.4        |
| ProST, ICCV23 [26]       | 46.3        | 74.2        | 83.2        | 203.7        |
| DGL, AAAI24 [52]         | 43.5        | 70.5        | 80.7        | 194.7        |
| EERCF, AAAI24 [44]       | 44.7        | 74.2        | 83.9        | 202.8        |
| TempMe, ICLR25 [42]      | 45.6        | 72.4        | 81.2        | 199.2        |
| DiscoVLA, CVPR25 [41]    | 47.7        | 73.6        | 83.6        | 204.9        |
| <b>Audiovisual:</b>      |             |             |             |              |
| EclipSE, ECCV22 [27]     | 44.7        | 71.3        | 82.8        | 198.8        |
| TEFAL, ICCV23 [17]       | 47.1        | 75.1        | 84.9        | 207.1        |
| AVIGATE, CVPR25 [18]     | <b>49.7</b> | 75.3        | 83.7        | 208.7        |
| AVIGATE+                 | 49.5        | 75.5        | 85.4        | 210.4        |
| SAVE                     | 48.9        | <b>78.0</b> | <b>86.5</b> | <b>213.4</b> |
| SAVE-h                   | 46.7        | 76.0        | 85.6        | 208.3        |

Table S3. The retrieval performance of different methods on CLIP ViT-B/16 backbone. Dataset: MSRVT-9k.

| Model                    | Text-to-Video Retrieval |             |             |              | Video-to-Text Retrieval |             |             |              |
|--------------------------|-------------------------|-------------|-------------|--------------|-------------------------|-------------|-------------|--------------|
|                          | R1                      | R5          | R10         | SumR         | R1                      | R5          | R10         | SumR         |
| <b>Vision-only:</b>      |                         |             |             |              |                         |             |             |              |
| CLIP4Clip, Neucom22 [32] | 46.4                    | 72.1        | 82.0        | 200.5        | 45.4                    | 73.4        | 82.4        | 201.2        |
| X-Pool, CVPR22 [10]      | 48.2                    | 73.7        | 82.6        | 204.5        | 46.4                    | 73.9        | 84.1        | 204.4        |
| TS2-Net, ECCV22 [30]     | 49.4                    | 75.6        | 85.3        | 210.3        | 46.6                    | 75.9        | 84.9        | 207.4        |
| X-CLIP, MM22 [33]        | 49.3                    | 75.8        | 84.8        | 209.9        | 48.9                    | 76.3        | 85.4        | 210.6        |
| STAN, CVPR23 [28]        | 50.0                    | 75.2        | 84.1        | 209.3        | -                       | -           | -           | -            |
| UATVR, ICCV23 [4]        | 50.8                    | 76.3        | 85.5        | 212.6        | 48.1                    | 76.3        | 85.4        | 209.8        |
| UCoFiA, ICCV23 [48]      | 49.8                    | 74.6        | 83.5        | 207.9        | 49.1                    | 77.0        | 83.8        | 209.9        |
| ProST, ICCV23 [26]       | 49.5                    | 75.0        | 84.0        | 208.5        | 48.0                    | 75.9        | 85.2        | 209.1        |
| DGL, AAAI24 [52]         | 48.3                    | 71.8        | 80.6        | 200.7        | 45.7                    | 74.0        | 82.9        | 202.6        |
| EERCF, AAAI24 [44]       | 49.9                    | 76.5        | 84.2        | 210.6        | 47.8                    | 75.3        | 85.4        | 207.3        |
| TeachCLIP, CVPR24 [45]   | 48.0                    | 75.9        | 83.5        | 207.4        | -                       | -           | -           | -            |
| TempMe, ICLR25 [42]      | 49.0                    | 74.4        | 83.3        | 206.7        | 47.6                    | 75.3        | 85.4        | 208.3        |
| DiscoVLA, CVPR25 [41]    | 50.5                    | 75.6        | 83.8        | 209.9        | 49.2                    | 76.0        | 84.7        | 209.9        |
| PIG, ICCV25 [23]         | 51.2                    | 75.1        | 84.5        | 210.8        | -                       | -           | -           | -            |
| <b>Audiovisual:</b>      |                         |             |             |              |                         |             |             |              |
| TEFAL, ICCV23 [17]       | 49.9                    | 76.2        | 84.4        | 210.5        | -                       | -           | -           | -            |
| AVIGATE, CVPR25 [18]     | 52.1                    | 76.4        | 85.2        | 213.7        | 51.2                    | 77.9        | 86.2        | 215.3        |
| SAVE                     | <b>54.5</b>             | <b>80.3</b> | <b>87.4</b> | <b>222.2</b> | <b>51.4</b>             | <b>80.1</b> | <b>87.0</b> | <b>218.5</b> |
